1 **HIV-1 Protease Evolvability is Affected by Synonymous Nucleotide Recoding**

2

3 Maria Nevot<sup>1</sup>, Ana Jordan-Paiz, Glòria Martrus<sup>1,2</sup>, Cristina Andrés<sup>1,3</sup>, Damir García-  
4 Cehic<sup>4,5</sup>, Josep Gregori<sup>4,6</sup>, Sandra Franco<sup>1</sup>, Josep Quer<sup>4,5,7</sup> and Miguel Angel Martinez<sup>1#</sup>

5

6 <sup>1</sup>IrsiCaixa, Hospital Universitari Germans Trias i Pujol, Universitat Autònoma de  
7 Barcelona (UAB), Badalona, Spain

8 <sup>2</sup>Current address: Heinrich-Pette-Institute, Leibniz Institute for Experimental Virology,  
9 Hamburg, Germany.

10 <sup>3</sup>Current address: Virology Unit, Microbiology Department, Hospital Universitari Vall  
11 d'Hebron, Vall d'Hebron Research Institute, Universitat Autònoma de Barcelona  
12 (UAB), Barcelona, Spain.

13 <sup>4</sup>Liver Unit, Liver Disease Laboratory-Viral Hepatitis, Internal Medicine Department,  
14 Vall d'Hebron Institut Recerca (VHIR)-Hospital Universitari Vall d'Hebron (HUVH),  
15 Barcelona, Spain

16 <sup>5</sup>Centro de Investigación Biomédica en Red (CIBER) de Enfermedades Hepáticas y  
17 Digestivas (CIBERehd) del Instituto de Salud Carlos III, Madrid, Spain

18 <sup>6</sup>Roche Diagnostics SL, Sant Cugat del Vallès, Barcelona, Spain

19 <sup>7</sup>Universitat Autònoma de Barcelona, Bellaterra, Barcelona, Spain

20

21 **#Address correspondence to** Miguel Angel Martínez, Fundació irsiCaixa, Hospital  
22 Universitari Germans Trias i Pujol, 08916 Badalona, Spain. Tel: +34 934656374; Fax:  
23 +34 934653968; E-mail address: [mmartinez@irsicaixa.es](mailto:mmartinez@irsicaixa.es)

24

25

26 **ABSTRACT**

27 One unexplored aspect of HIV-1 genetic architecture is how codon choice influences  
28 population diversity and evolvability. Here we compared the development of HIV-1  
29 resistance to protease inhibitors (PIs) between wild-type (WT) virus and a synthetic  
30 virus (MAX) carrying a codon-pair re-engineered protease sequence including 38 (13%)  
31 synonymous mutations. WT and MAX viruses showed indistinguishable replication in  
32 MT-4 cells or PBMCs. Both viruses were subjected to serial passages in MT-4 cells  
33 with selective pressure from the PIs atazanavir (ATV) and darunavir (DRV). After 32  
34 successive passages, both the WT and MAX viruses developed phenotypic resistance to  
35 PIs ( $IC_{50}$   $14.6 \pm 5.3$  and  $21.2 \pm 9$  nM for ATV, and  $5.9 \pm 1.0$  and  $9.3 \pm 1.9$  for DRV,  
36 respectively). Ultra-deep sequence clonal analysis revealed that both viruses harbored  
37 previously described resistance mutations to ATV and DRV. However, the WT and  
38 MAX virus proteases showed different resistance variant repertoires, with the G16E and  
39 V77I substitutions observed only in WT, and the L33F, S37P, G48L, Q58E/K, and L89I  
40 substitutions detected only in MAX. Remarkably, G48L and L89I are rarely found *in*  
41 *vivo* in PI-treated patients. The MAX virus showed significantly higher nucleotide and  
42 amino acid diversity of the propagated viruses with and without PIs ( $P < 0.0001$ ),  
43 suggesting higher selective pressure for change in this recoded virus. Our results  
44 indicate that HIV-1 protease position in sequence space delineates the evolution of its  
45 mutant spectra. Nevertheless, the investigated synonymously recoded variant showed  
46 mutational robustness and evolvability similar to the WT virus.

47

48 **IMPORTANCE**

49 Large-scale synonymous recoding of virus genomes is a new tool for exploring various  
50 aspects of virus biology. Synonymous virus genome recoding can be used to investigate

51 how a virus's position in sequence space defines its mutant spectrum, evolutionary  
52 trajectory, and pathogenesis. In this study, we evaluated how synonymous recoding of  
53 the human immunodeficiency virus type 1 (HIV-1) protease impacts the development of  
54 protease inhibitor (PI) resistance. HIV-1 protease is a main target of current  
55 antiretroviral therapies. Our present results demonstrate that the wild-type (WT) virus  
56 and the virus with the recoded protease exhibited different patterns of resistance  
57 mutations after PI treatment. Nevertheless, the developed PI resistance phenotype was  
58 indistinguishable between the recoded virus and the WT virus, suggesting that the  
59 synonymously recoded protease HIV-1 and the WT protease virus were equally robust  
60 and evolvable.  
61

## 62 INTRODUCTION

63 Alterations in a DNA or mRNA sequence that do not change the protein amino acid  
64 sequence are called synonymous mutations. Although they do not influence the  
65 resulting protein sequence, synonymous mutations can still substantially affect cellular  
66 processes (1, 2). Notably, synonymous virus genome recoding can impact viral  
67 replication capacity and fitness (3), reportedly leading to attenuation of multiple RNA  
68 and DNA viruses, including poliovirus (4-7), influenza virus (8, 9), HIV-1 (10-12), SIV  
69 (13), Chikungunya virus (14), human respiratory syncytial virus (15-17), porcine  
70 reproductive and respiratory syndrome virus (18), echovirus 7 (19, 20), tick-borne  
71 encephalitis virus (21), vesicular stomatitis virus, dengue virus (22), adeno-associated  
72 virus (23), and papillomavirus (24).

73         Synonymous virus genome recoding is being investigated as a new strategy for  
74 generating novel live-attenuated vaccine candidates. This method is promising because  
75 the amino acid coding is completely unaffected, thereby avoiding the potential  
76 generation of new and undesirable biological properties. Moreover, synonymous virus  
77 genome recoding involves the introduction of hundreds or thousands of nucleotide  
78 substitutions, which minimizes the risk of phenotypic reversion via point mutations or  
79 through recombination with homologous sequences in circulating strains. This is  
80 particularly important with regards to RNA viruses, since viral RNA polymerases lack  
81 error-correction mechanisms (25-27). The high genetic variability of RNA viruses is a  
82 critical limitation when designing novel antiviral strategies.

83         The usefulness of synonymous virus genome recoding goes beyond the  
84 generation of new live attenuated vaccines. This method has also been used to identify  
85 specific RNA structures required for virus replication (28), virus genome cis-inhibitory  
86 signal sequences important for complex viral functions (23), and novel antiviral

87 mechanisms within the innate immune response (11, 29, 30), as well as to resolve the  
88 importance of codon usage in the temporal regulation of viral gene expression (31). In  
89 one interesting example, synonymous virus genome recoding was used to demonstrate  
90 that a synonymous position in sequence space can impact poliovirus evolvability and  
91 pathogenesis (32, 33).

92 Like other RNA viruses, human immunodeficiency virus type 1 (HIV-1)  
93 populations comprise a closely related mutant spectra or mutant clouds termed viral  
94 quasispecies (34, 35). Mutant cloud composition can impact virus evolvability, fitness,  
95 and virulence (25-27). One unexplored aspect of HIV-1 genetic architecture is how  
96 codon choice influences population diversity and evolvability. It is presently unclear  
97 whether HIV-1 sequences have evolved to optimize both protein coding and DNA/RNA  
98 sequences. The HIV-1 genome exhibits a particularly striking bias towards enrichment  
99 of A-rich codons, which may be a selectable trait (36) and affect innate immune  
100 recognition (11, 29). Similarly, synonymous codon usage can temporally regulate  
101 expressions of structural gene products of the simian immunodeficiency virus (SIV)  
102 (31) and regulate HIV-1 splicing and replication (12).

103 Here we aimed to explore whether synonymous sequence space influences the  
104 development of protease inhibitor (PI) resistance, and to thus determine whether HIV-1  
105 evolvability is influenced by the natural position of a protease in sequence space. To  
106 this end, we compared the development of HIV-1 resistance to the protease inhibitors  
107 atazanavir (ATV) and darunavir (DRV) between wild-type HIV-1 (WT) and synthetic  
108 HIV-1 carrying a synonymously recoded protease sequence (MAX).

109  
110  
111

## 112 RESULTS

113 WT HIV-1 was compared with the MAX variant that carried a protease gene including  
114 38 synonymous mutations (13% of the protease sequence) (Fig. 1). These 38  
115 synonymous substitutions were scattered throughout the protease coding region,  
116 excluding the first 40 amino-terminal nucleotides that overlap with the carboxy-terminal  
117 of the gag p6 reading frame. These 38 substitutions were chosen in order to improve  
118 protease gene codon pair bias (6) without modifying its codon bias or folding free  
119 energy (10). The WT and MAX viruses have identical consensus amino acid sequences,  
120 and, as we have previously demonstrated (10), this MAX variant and the WT virus  
121 show indistinguishable replication in MT-4 cells (Fig. 2) or PBMCs (10).

122 We subjected the WT and MAX viruses to selective pressure from two PIs: ATV  
123 and DRV. The viruses were propagated in duplicate in MT-4 cells over 32 serial  
124 passages (128 days of culture) without drugs or with increasing concentrations of ATV  
125 or DRV. The starting PI concentrations were near the half maximal inhibitory  
126 concentration ( $IC_{50}$ ) for the WT HXB2 virus (10). Before the passages, both viruses  
127 showed similar  $IC_{50}$  values for ATV and DRV (Table 1) (10). The WTp32 and  
128 MAXp32 viruses still showed comparable  $IC_{50}$  values after 32 serial passages in the  
129 presence or absence of PIs (Table 1). WTp32 and MAXp32, respectively, showed 5-  
130 fold and 13-fold increases in  $IC_{50}$  for ATV, and 6-fold and 10-fold increases in  $IC_{50}$  for  
131 DRV (Table 1). Although MAXp32 displayed a higher resistance to ATV and DRV  
132 than WTp32 (Table1), these differences were not significant ( $P = 0.4816$  and  $P =$   
133  $0.3451$ , respectively). These assays demonstrated that the MAX variant virus did not  
134 show impaired capacity to develop phenotypic resistance to PIs.

135 After the 32 cell passages in the presence of ATV or DRV, virus RNA was  
136 recovered. This RNA was RT-PCR amplified and ultra-deep sequenced, and we

137 compared the frequencies of resistant mutations. For each of the two studied viruses and  
138 the two tested drugs, we sequenced between  $1.9 \times 10^7$  and  $4.1 \times 10^7$  individual protease  
139 nucleotides (Table 2). Sequence clonal analysis revealed no resistance-associated  
140 substitutions in viruses propagated without drugs (Table 3). On the other hand, both WT  
141 and MAX viruses propagated in the presence of PIs developed previously described  
142 resistance mutations to ATV and DRV (Table 3). Moreover, the resistance variant  
143 repertoire differed between the MAX and WT viruses (Table 3). Specifically, the G16E  
144 substitution was observed only in the WT protease virus propagated with ATV or DRV.  
145 Notably, the WT protease required only a transition to develop this substitution,  
146 whereas the MAX protease would need two substitutions, a transition, and a  
147 transversion. Additionally, the L33F, G48L, Q58E/K, and I89L substitutions were  
148 detected only in the recoded MAX protease. Other accompanying substitutions were  
149 also detected only in the MAX virus (e.g., E21K, H69Y, and T91S), mainly in the MAX  
150 virus (e.g., L10F), or only in the WT virus (e.g., L23I, P39Q, and V77I). Interestingly,  
151 some resistance mutations selected by the MAX protease virus (i.e., G48L and I89L),  
152 are extremely rare non-polymorphic substitutions *in vivo* (37). This finding indicates  
153 that the MAX protease may explore a different sequence space than that of the WT  
154 protease. Similar to G16E, the I89L mutation requires two substitutions in the WT  
155 background and only one substitution in the MAX background. However, there were no  
156 obvious reasons for the preferential emergence of K45I, G48L, Q58E and I84V in the  
157 MAX background. Substitutions L10F, G16E, L33F, Q58E/K, V77I, I84V, and I89L  
158 have been previously associated with PIs resistance (38). In contrast, E21K, L23I,  
159 P39Q, G48L, H69Y, and T91S have not been described as associated to PIs resistance.  
160 To explore the favored emergence in the presence of ATV of G48L, Q58E, I84V  
161 and I89L in the MAX background and to determine the effect of these substitutions in

162 the WT background, we used site-directed mutagenesis to introduce ~~this~~ these mutations  
163 in both the WT and MAX protease backgrounds. The substitution S37P, preferentially  
164 selected in the MAX background when the virus was propagated in the absence of drug  
165 (Table 2), was also included in this analysis. We found that the five generated mutants  
166 displayed comparable IC<sub>50</sub> values to ATV in both backgrounds, WT and MAX (Table  
167 3). We also determined the replication capacity of these ~~two~~ ten mutant viruses in MT-4  
168 cells with and without ATV (Fig. 2). Similar to the IC<sub>50</sub> results, the five tested variants  
169 exhibited similar replication capacities in both backgrounds, WT and MAX, in either  
170 absence or presence of 20nM ATV (Fig. 2). Only WTG48L and MAXG48L showed a  
171 lower replication capacity in the absence of drug. Likewise, only substitutions at  
172 positions G48L and Q58E conferred an advantage when viruses were propagated in the  
173 presence of 20nM ATV. These results demonstrated that the G48L, Q58E, I84V and  
174 I89L substitutions were not intrinsically prohibited in the WT protease background, and  
175 that other factors must explain their low *in vivo* frequency.

176 The amino acid mutant repertoire also differed between the WT and MAX  
177 viruses when they were propagated without drugs (Table 2). Only one variant, D30N,  
178 was detected in both virus populations. We do not know whether the observed variants  
179 are adaptive or neutral mutations. Regardless, completely different mutant spectra were  
180 detected in these two viruses.

181 We performed a maximum likelihood phylogenetic reconstruction of all WT and  
182 MAX unique amino acid variants that were recovered after 32 MT-4 cell passages in the  
183 presence of ATV or DRV. Remarkably, the results showed that the two viruses, which  
184 shared an identical starting amino acid sequence, followed different evolutionary  
185 trajectories (Fig. 3). Upon visual inspection of these phylogenetic trees, it was also



186 apparent that the MAX protease generated higher amino acid variant diversity (see  
187 below).

188 We next compared the overall population nucleotide diversity of the WT and  
189 MAX proteases after 32 passages in the absence or presence of ATV or DRV (Table 4).  
190 Overall, nucleotide sequence diversity was significantly higher in MAX populations  
191 propagated with ATV,  $0.00946 \pm 0.00005$  vs.  $0.00517 \pm 0.00004$  ( $P < 0.0001$ ), but not  
192 meaningful differences were observed in the presence of DRV,  $0.00490 \pm 0.00004$  vs.  
193  $0.00482 \pm 0.00003$ . As expected, in the presence of a PI, we detected a higher number  
194 of nonsynonymous substitutions than synonymous substitutions in both the WT and  
195 MAX virus proteases. However, the MAX populations always displayed a significantly  
196 higher diversity ( $P < 0.0001$ ) of either synonymous or nonsynonymous mutations  
197 (Table 4). Diversity was also strikingly higher in MAX populations when viruses were  
198 propagated in the absence of drug ( $0.00095 \pm 0.00001$  vs.  $0.00057 \pm 0.00001$ ,  $P <$   
199  $0.0001$ ) (Table 4). Interestingly, in the absence of drugs, the MAX population showed  
200 significantly higher nonsynonymous diversity ( $0.00117 \pm 0.00001$  vs.  $0.00061 \pm$   
201  $0.00001$ ,  $P < 0.0001$ ) but not synonymous diversity ( $0.000310 \pm 0.00002$  vs.  $0.00053 \pm$   
202  $0.00002$ ,  $P < 0.0001$ ). This suggested that the WT and MAX viruses are subjected to  
203 different selective forces in the absence of pressure from a PI. Compared to WT, the  
204 MAX populations also showed higher Shannon's entropy values, another parameter for  
205 measuring genetic population diversity (Table 4). Notably, after 32 passages in cell  
206 culture, we observed no significant reversions of the starting synonymous substitutions  
207 introduced in the MAX protease, either in the presence or absence of PIs. Overall, our  
208 results demonstrated that MAX viruses displayed higher population genetic diversity  
209 after 32 passages in cell culture in the presence or absence of PIs.

210

## 211 **DISCUSSION**

212 Previous research shows that codon usage can determine the mutational robustness,  
213 evolutionary capacity, and virulence of poliovirus (32). Earlier results indicate that  
214 polioviruses with synonymously mutated capsids were less mutationally robust and  
215 displayed an attenuated phenotype in an animal model. However, that study did not  
216 focus on how synonymous mutations might affect the development of escape mutations  
217 to overcome specific selection pressure targeting a precise virus gene. Here we tested  
218 the extent to which a synonymously recoded HIV-1 protease reacted to the specific  
219 selective pressure of a PI. Our present study also explored the evolvability of a  
220 retrovirus which, in contrast to other RNA viruses, integrates into the host cell genome  
221 such that viral proteins are translated from mRNAs using host cellular machinery.

222 We found that the WT and MAX protease viruses displayed different patterns of  
223 resistance mutations after PI treatment. These findings extend those of Lauring et al.  
224 (32), confirming that synonymously recoded and WT HIV-1 proteases occupy different  
225 sequence spaces. We further demonstrated that although the MAX and WT proteases  
226 occupied different sequence spaces, they still showed similar development of  
227 phenotypic resistance to PIs. These findings indicate that the recoded protease did not  
228 attenuate the virus' capability to develop PI resistance, strongly suggesting that the  
229 MAX protease was as robust as the WT protease with regards to this trait. To our  
230 knowledge, this is the first study to investigate the evolvability of a synonymously  
231 recoded virus enzyme. Even if the resistance selection was conducted in MT4 cells and  
232 the result probably would be qualitatively different in primary cells, our results build on  
233 and augment the convincing evidence that recoded proteins occupy a different sequence  
234 space.

235           In some instances, the different mutant repertoire within the MAX protease  
236 background can be easily explained by proximity within the corresponding sequence  
237 space (e.g., G16E and L89I). However, with regards to other mutations, the explanation  
238 for the difference is not readily apparent (e.g., S37P, G48L, Q58E and I84V). In  
239 particular, the G48L substitution is very rarely selected *in vivo* in patients undergoing PI  
240 therapy (37). However, when the above substitutions (S37P, G48L, Q58E, I84V or  
241 L89I) were introduced in the WT sequence they showed parallel replication capacities  
242 to those observed with a MAX background. We can speculate that the introduced  
243 synonymous substitutions affected neighboring residues (e.g., RNA structure).  
244 However, it must be noted that the MAX and WT proteases have similar RNA folding  
245 free energy (10).

246           One plausible explanation is based on epistatic interactions between protease  
247 amino acid substitutions. Epistasis is a phenomenon by which a mutation's impact on  
248 protein stability or fitness depends on the genetic background in which it is acquired  
249 (39). Complex mutational patterns often arise during the development of resistance to  
250 HIV-1 protease inhibitors. More therapy-associated mutations accumulate under PI  
251 therapy than under all other types of antiretroviral therapy. Moreover, among patients  
252 experiencing therapy failure, the majority of *in vivo* drug-experienced protease  
253 sequences include over four mutations associated with PI therapy (40). Recent findings  
254 suggest that the consequences of acquiring primary HIV-1 protease resistance mutations  
255 depend on epistatic interactions with the sequence background (41). In our study, over  
256 80% of the MAX protease clones harboring the G48L mutation also had the I89L  
257 substitution. As mentioned above, I89L requires two nucleotide substitutions in the WT  
258 background and only one in the MAX background. In either case, our results strongly  
259 suggest that the MAX protease's sequence position affects its genotypic PI resistance

260 profile. Synonymous codons differ in their propensity to mutate and, as previously  
261 suggested (25, 32, 42), this differential access to protein sequence space may affect  
262 adaptive pathways.

263         Another intriguing finding of our study is that the MAX virus showed higher  
264 population diversity in the recoded and targeted gene following propagation in both the  
265 absence and presence of PIs. Again, we can speculate that although the MAX virus  
266 shows high fitness in tissue culture, it is subjected to greater pressure to changing or  
267 reverting to a WT synonymous background. However, remarkably, we detected almost  
268 no reversions of the synonymous substitutions introduced in the MAX protease  
269 following propagation in the presence or absence of PIs. One limitation of our study is  
270 that we investigated only one virus enzyme or protein. Further studies should include  
271 other virus proteins and other selective pressures (e.g., neutralizing antibodies and  
272 cellular virus restriction factors).

273         It has been suggested that RNA virus synonymous recoding can be used to push  
274 a virus to a sequence space region having a low density of neutral mutations (32). Such  
275 a lack of access to neutral substitutions could potentially reduce the virus' capacity to  
276 generate fit progeny and adaptability to the host's selective pressures, such that this  
277 method might serve as a new strategy for development of attenuated vaccines. Our  
278 present data suggest that this approach must be developed cautiously, and support a  
279 need to evaluate the long-term stability of synonymously recoded viruses and to  
280 carefully test individual candidates.

281

## 282 **MATERIALS AND METHODS**

283 **Cell line and viruses.** MT-4 cells were obtained from the National Institutes of Health  
284 (NIH) AIDS Research and Reference Reagent Program, and were grown in Roswell

285 Park Memorial Institute (RPMI) 1640 L-glutamine medium supplemented with 10%  
286 heat-inactivated fetal bovine serum (FBS) (Gibco). The utilized WT virus corresponded  
287 to the HIV-1 HXB2 strain (<http://www.hiv.lanl.gov>) (Genbank accession number:  
288 K03455). The synthetic MAX HIV-1 protease was generated by PCR amplification  
289 with a combination of three overlapping synthetic DNA oligonucleotides, as previously  
290 described (10). In MT-4 cells, the MAX protease PCR product was recombined with a  
291 protease-deleted HXB2 infectious clone that had been previously linearized with BstE II  
292 (43). The protease PCR oligonucleotides used to reconstruct the full-length protease  
293 have been previously described (43). WT and MAX S37P, G48L, Q58E, I84V and I89L  
294 mutants were generated by site-directed mutagenesis using overlap extension PCR with  
295 mutated oligonucleotides as previously described (44). Again, the mutant protease PCR  
296 products were recombined with the protease-deleted HXB2 infectious clone in MT-4  
297 cells. Cell culture supernatants were harvested at 3, 5, and 7 days post-transfection when  
298 the HIV-1 p24 antigen concentration surpassed 500 ng/ml as measured by the  
299 Genscreen HIV-1 Ag assay (Bio-Rad). Virus titration was performed in MT-4 cells, and  
300 values were expressed as tissue culture dose for 50% infectivity (TCID<sub>50</sub>) as previously  
301 described (45).

302 **Replication capacity assays.** Viral replication kinetics were analyzed by  
303 infecting  $1 \times 10^6$  MT-4 cells with 200 TCID<sub>50</sub> (MOI of 0.0002). The infected cells were  
304 incubated for 4 h at 37°C and 5% CO<sub>2</sub>, washed twice with phosphate-buffered saline  
305 (PBS), and then resuspended in RPMI medium supplemented with 10% FBS. To  
306 quantify viral replication, we measured the HIV-1 capsid p24 antigen concentration in  
307 200- $\mu$ l aliquots of supernatant collected every 24 h for 4–6 days. Growth kinetics were  
308 analyzed by fitting a linear model to the log-transformed p24 data during the

309 exponential growth phase using maximum likelihood methods as previously described  
310 (10).

311 **HIV-1 drug susceptibility tests.** ATV and DRV were obtained from the NIH  
312 AIDS Research and Reference Reagent Program. Following virus propagation and  
313 titration, we used a tetrazolium-based colorimetric method to determine the HIV-1 drug  
314 susceptibility ( $IC_{50}$ ) to ATV and DRV in MT-4 cells using a MOI of 0.003, as  
315 previously described (10, 46).

316 **Selection of ATV- and DRV-resistant viruses.** WT and MAX viruses were  
317 added at an MOI of 0.01 to  $1 \times 10^6$  MT-4 cells, and the cells were maintained as  
318 described above. After 4 days, we transferred one-tenth of the culture, including cells  
319 and supernatant, into  $1 \times 10^6$  fresh MT-4 cells. All virus passages were performed in  
320 duplicate. Virus production was monitored by measurements of p24 antigen. The  
321 starting concentrations were 4 nM ATV and 3 nM DRV. Through the passages, the drug  
322 concentration was increased until reaching 40 nM ATV and 25 nM DRV. In parallel,  
323 both viruses were also propagated without either drug.

324 At passages 1 and 32, 140- $\mu$ l aliquots of culture supernatant were collected, from  
325 which we isolated WT and MAX viral genomic RNA using the QIAamp Viral RNA Kit  
326 (QIAGEN). This purified viral RNA was then reverse transcribed and PCR amplified  
327 using the SuperScript III First-Strand Synthesis System for RT-PCR (Invitrogen) and 10  
328 pmol of the corresponding protease oligonucleotides, which are described elsewhere  
329 (43). Details of this protocol were previously reported (47, 48). These PCR products  
330 were the starting material for performing ultra-deep sequencing.

331 **Ultra-deep sequencing.** Massive parallel sequencing was performed in the  
332 MiSeq (Illumina) platform. Libraries of 558-nt DNA fragments were ligated to the  
333 Illumina adapters using the KAPA HyperPrep Kit (Roche #07962347001), SeqCap

334 Adapter Kit A (Roche #07141530001), and SeqCap Adapter Kit B (Roche  
335 #07141548001). The products were purified using KAPA Pure Beads (Roche  
336 #07983280001). All libraries were quantified using the Qubit® dsDNA HS Assay Kit  
337 (ThermoFisher #Q32854) and a Qubit Fluorometer (ThermoFisher #Q33216), and were  
338 qualified using the Agilent DNA 1000 Kit (Agilent #5067-1504) and a bioanalyzer  
339 (Agilent #G2939BA). Sequencing was performed using the Illumina MiSeq® Reagent  
340 Kit v3 (600 cycle) (Illumina #MS-102-3003) following manufacturer's protocol.  
341 Sequencing and paired-end analysis were performed to obtain robust fastq data for  
342 bioinformatics analysis. We obtained a mean of 50,000 sequences (reads) per amplicon  
343 and per patient sample.

344 Fastq files by index and pool were obtained from MiSeq and submitted to  
345 FLASH (49). The  $2 \times 300$  paired-end reads were overlapped to reconstruct the  
346 amplicons, with the minimum number of overlapping nucleotides set to 20, and the  
347 maximum number of overlapping mismatches set to 10%. The subsequent analysis was  
348 performed as previously described (50). Briefly, fastq files were demultiplexed using  
349 amplicon oligonucleotides, and oligonucleotides were trimmed at both ends. Each  
350 amplicon and strand read was pairwise aligned with respect to the reference WT  
351 sequence, insertions were removed, and deletions were repaired if fewer than three gaps  
352 were produced. Reads with multiple indeterminations were removed, while reads  
353 having a single indetermination were repaired as per the reference sequence. Filtered  
354 and repaired reads were collapsed into haplotypes with corresponding frequencies.  
355 Haplotypes with abundances below 0.1% or that were unique to the forward or reverse  
356 strands were removed. Haplotypes common to the forward and reverse strands and with  
357 abundances of  $\geq 0.1\%$ , were considered consensus haplotypes, and their frequencies  
358 were summed. In the final step to remove artifacts, consensus haplotypes with

359 abundances below 0.5% were filtered out. All computations were performed in the R  
360 language and platform, using in-house developed scripts as well as the packages  
361 Biostrings (R package 2.24.1, 2012), Ape (51), and Seqinr (52).

362 Virus population genetic diversity (p-distance) was determined using the  
363 MEGA6 software package (53). To determine possible selective pressures, the MEGA6  
364 software package was used to calculate the proportion of synonymous substitutions per  
365 potential synonymous sites, and the proportion of nonsynonymous substitutions per  
366 potential nonsynonymous sites. Shannon's entropy values were calculated as  $S_n = -\sum_i$   
367  $(p_i \ln p_i) / \ln N$ , where N is the total number of analyzed sequences and  $p_i$  is the frequency  
368 of each sequence in the viral quasispecies.  $S_n$  values vary from 0 (no complexity) to 1  
369 (maximum complexity) (54). The phylogenetic reconstructions were also performed  
370 using the MEGA6 software package.

371

### 372 **Statistical analysis.**

373 Virus population diversity was compared by unpaired t-test using GraphPad  
374 Prism version 7 for Windows. The significance of the difference between replication  
375 kinetic slopes and  $IC_{50}$ s was calculated using an unpaired t-test with Welch's correction  
376 as implemented in GraphPad Prism.

377

### 378 **ACKNOWLEDGEMENTS**

379 This study was supported by the Spanish Ministry of Economy and Competitiveness  
380 (SAF2016-75277-R) by Instituto de Salud Carlos III (PI16/00337), and cofinanced by  
381 the European Regional Development Fund (ERDF). MN was supported by the Instituto  
382 de Salud Carlos III through the Spanish AIDS network (RD16/0025/0041). AJ-P was



383 supported by a contract of the Spanish Ministry of Economy and Competitiveness  
384 (BES-2014-069931).

385

386 **REFERENCES**

- 387 1. **Hunt RC, Simhadri VL, Iandoli M, Sauna ZE, Kimchi-Sarfaty C.** 2014.  
388 Exposing synonymous mutations. *Trends in genetics : TIG* **30**:308-321.
- 389 2. **Plotkin JB, Kudla G.** 2011. Synonymous but not the same: the causes and  
390 consequences of codon bias. *Nature reviews. Genetics* **12**:32-42.
- 391 3. **Martinez MA, Jordan-Paiz A, Franco S, Nevot M.** 2016. Synonymous Virus  
392 Genome Recoding as a Tool to Impact Viral Fitness. *Trends in microbiology*  
393 **24**:134-147.
- 394 4. **Burns CC, Campagnoli R, Shaw J, Vincent A, Jorba J, Kew O.** 2009.  
395 Genetic inactivation of poliovirus infectivity by increasing the frequencies of  
396 CpG and UpA dinucleotides within and across synonymous capsid region  
397 codons. *Journal of virology* **83**:9957-9969.
- 398 5. **Burns CC, Shaw J, Campagnoli R, Jorba J, Vincent A, Quay J, Kew O.**  
399 2006. Modulation of poliovirus replicative fitness in HeLa cells by  
400 deoptimization of synonymous codon usage in the capsid region. *Journal of*  
401 *virology* **80**:3259-3272.
- 402 6. **Coleman JR, Papamichail D, Skiena S, Futcher B, Wimmer E, Mueller S.**  
403 2008. Virus attenuation by genome-scale changes in codon pair bias. *Science*  
404 **320**:1784-1787.
- 405 7. **Mueller S, Papamichail D, Coleman JR, Skiena S, Wimmer E.** 2006.  
406 Reduction of the rate of poliovirus protein synthesis through large-scale codon

- 407 deoptimization causes attenuation of viral virulence by lowering specific  
408 infectivity. *Journal of virology* **80**:9687-9696.
- 409 8. **Mueller S, Coleman JR, Papamichail D, Ward CB, Nimmual A, Futcher B,**  
410 **Skiena S, Wimmer E.** 2010. Live attenuated influenza virus vaccines by  
411 computer-aided rational design. *Nat Biotechnol* **28**:723-726.
- 412 9. **Yang C, Skiena S, Futcher B, Mueller S, Wimmer E.** 2013. Deliberate  
413 reduction of hemagglutinin and neuraminidase expression of influenza virus  
414 leads to an ultraproductive live vaccine in mice. *Proceedings of the National*  
415 *Academy of Sciences of the United States of America* **110**:9481-9486.
- 416 10. **Martus G, Nevot M, Andres C, Clotet B, Martinez MA.** 2013. Changes in  
417 codon-pair bias of human immunodeficiency virus type 1 have profound effects  
418 on virus replication in cell culture. *Retrovirology* **10**:78.
- 419 11. **Takata MA, Goncalves-Carneiro D, Zang TM, Soll SJ, York A, Blanco-**  
420 **Melo D, Bieniasz PD.** 2017. CG dinucleotide suppression enables antiviral  
421 defence targeting non-self RNA. *Nature* **550**:124-127.
- 422 12. **Takata MA, Soll SJ, Emery A, Blanco-Melo D, Swanstrom R, Bieniasz PD.**  
423 2018. Global synonymous mutagenesis identifies cis-acting RNA elements that  
424 regulate HIV-1 splicing and replication. *PLoS pathogens* **14**:e1006824.
- 425 13. **Vabret N, Bailly-Bechet M, Lepelley A, Najburg V, Schwartz O, Verrier B,**  
426 **Tangy F.** 2014. Large-scale nucleotide optimization of simian  
427 immunodeficiency virus reduces its capacity to stimulate type I interferon in  
428 vitro. *Journal of virology* **88**:4161-4172.
- 429 14. **Nougairede A, De Fabritus L, Aubry F, Gould EA, Holmes EC, de**  
430 **Lamballerie X.** 2013. Random codon re-encoding induces stable reduction of

- 431 replicative fitness of Chikungunya virus in primate and mosquito cells. PLoS  
432 pathogens **9**:e1003172.
- 433 15. **Le Nouen C, Brock LG, Luongo C, McCarty T, Yang L, Mehedi M,**  
434 **Wimmer E, Mueller S, Collins PL, Buchholz UJ, DiNapoli JM.** 2014.  
435 Attenuation of human respiratory syncytial virus by genome-scale codon-pair  
436 deoptimization. Proceedings of the National Academy of Sciences of the United  
437 States of America **111**:13169-13174.
- 438 16. **Le Nouen C, McCarty T, Brown M, Smith ML, Lleras R, Dolan MA,**  
439 **Mehedi M, Yang L, Luongo C, Liang B, Munir S, DiNapoli JM, Mueller S,**  
440 **Wimmer E, Collins PL, Buchholz UJ.** 2017. Genetic stability of genome-scale  
441 deoptimized RNA virus vaccine candidates under selective pressure.  
442 Proceedings of the National Academy of Sciences of the United States of  
443 America **114**:E386-E395.
- 444 17. **Meng J, Lee S, Hotard AL, Moore ML.** 2014. Refining the balance of  
445 attenuation and immunogenicity of respiratory syncytial virus by targeted codon  
446 deoptimization of virulence genes. mBio **5**:e01704-01714.
- 447 18. **Ni YY, Zhao Z, Opriessnig T, Subramaniam S, Zhou L, Cao D, Cao Q,**  
448 **Yang H, Meng XJ.** 2014. Computer-aided codon-pairs deoptimization of the  
449 major envelope GP5 gene attenuates porcine reproductive and respiratory  
450 syndrome virus. Virology **450-451**:132-139.
- 451 19. **Atkinson NJ, Witteveldt J, Evans DJ, Simmonds P.** 2014. The influence of  
452 CpG and UpA dinucleotide frequencies on RNA virus replication and  
453 characterization of the innate cellular pathways underlying virus attenuation and  
454 enhanced replication. Nucleic acids research **42**:4527-4545.

- 455 20. **Tulloch F, Atkinson NJ, Evans DJ, Ryan MD, Simmonds P.** 2014. RNA  
456 virus attenuation by codon pair deoptimisation is an artefact of increases in  
457 CpG/UpA dinucleotide frequencies. *eLife* **3**:e04531.
- 458 21. **de Fabritus L, Nougairede A, Aubry F, Gould EA, de Lamballerie X.** 2015.  
459 Attenuation of tick-borne encephalitis virus using large-scale random codon re-  
460 encoding. *PLoS pathogens* **11**:e1004738.
- 461 22. **Shen SH, Stauff CB, Gorbatsvych O, Song Y, Ward CB, Yurovsky A,**  
462 **Mueller S, Futcher B, Wimmer E.** 2015. Large-scale recoding of an arbovirus  
463 genome to rebalance its insect versus mammalian preference. *Proceedings of the*  
464 *National Academy of Sciences of the United States of America* **112**:4749-4754.
- 465 23. **Sitaraman V, Hearing P, Ward CB, Gnatenko DV, Wimmer E, Mueller S,**  
466 **Skiena S, Bahou WF.** 2011. Computationally designed adeno-associated virus  
467 (AAV) Rep 78 is efficiently maintained within an adenovirus vector.  
468 *Proceedings of the National Academy of Sciences of the United States of*  
469 *America* **108**:14294-14299.
- 470 24. **Cladel NM, Budgeon LR, Hu J, Balogh KK, Christensen ND.** 2013.  
471 Synonymous codon changes in the oncogenes of the cottontail rabbit  
472 papillomavirus lead to increased oncogenicity and immunogenicity of the virus.  
473 *Virology* **438**:70-83.
- 474 25. **Dolan PT, Whitfield ZJ, Andino R.** 2018. Mapping the Evolutionary Potential  
475 of RNA Viruses. *Cell host & microbe* **23**:435-446.
- 476 26. **Andino R, Domingo E.** 2015. Viral quasispecies. *Virology* **479-480**:46-51.
- 477 27. **Mas A, Lopez-Galindez C, Cacho I, Gomez J, Martinez MA.** 2010.  
478 Unfinished stories on viral quasispecies and Darwinian views of evolution. *J*  
479 *Mol Biol* **397**:865-877.

- 480 28. **Song Y, Liu Y, Ward CB, Mueller S, Futcher B, Skiena S, Paul AV,**  
481 **Wimmer E.** 2012. Identification of two functionally redundant RNA elements  
482 in the coding sequence of poliovirus using computer-generated design.  
483 Proceedings of the National Academy of Sciences of the United States of  
484 America **109**:14301-14307.
- 485 29. **Li M, Kao E, Gao X, Sandig H, Limmer K, Pavon-Eternod M, Jones TE,**  
486 **Landry S, Pan T, Weitzman MD, David M.** 2012. Codon-usage-based  
487 inhibition of HIV protein synthesis by human schlafen 11. Nature **491**:125-128.
- 488 30. **Vabret N, Bhardwaj N, Greenbaum BD.** 2017. Sequence-Specific Sensing of  
489 Nucleic Acids. Trends in immunology **38**:53-65.
- 490 31. **Shin YC, Bischof GF, Lauer WA, Desrosiers RC.** 2015. Importance of codon  
491 usage for the temporal regulation of viral gene expression. Proceedings of the  
492 National Academy of Sciences of the United States of America **112**:14030-  
493 14035.
- 494 32. **Lauring AS, Acevedo A, Cooper SB, Andino R.** 2012. Codon usage  
495 determines the mutational robustness, evolutionary capacity, and virulence of an  
496 RNA virus. Cell host & microbe **12**:623-632.
- 497 33. **Lauring AS, Frydman J, Andino R.** 2013. The role of mutational robustness in  
498 RNA virus evolution. Nat Rev Microbiol **11**:327-336.
- 499 34. **Eigen M.** 1971. Selforganization of matter and the evolution of biological  
500 macromolecules. Naturwissenschaften **58**:465-523.
- 501 35. **Domingo E, Sabo D, Taniguchi T, Weissmann C.** 1978. Nucleotide sequence  
502 heterogeneity of an RNA phage population. Cell **13**:735-744.
- 503 36. **van der Kuyl AC, Berkhout B.** 2012. The biased nucleotide composition of the  
504 HIV genome: a constant factor in a highly variable virus. Retrovirology **9**:92.

- 505 37. **Gifford RJ, Liu TF, Rhee SY, Kiuchi M, Hue S, Pillay D, Shafer RW.** 2009.  
506 The calibrated population resistance tool: standardized genotypic estimation of  
507 transmitted HIV-1 drug resistance. *Bioinformatics* **25**:1197-1198.
- 508 38. **Wensing AM, Calvez V, Gunthard HF, Johnson VA, Paredes R, Pillay D,**  
509 **Shafer RW, Richman DD.** 2017. 2017 Update of the Drug Resistance  
510 Mutations in HIV-1. *Topics in antiviral medicine* **24**:132-133.
- 511 39. **Parera M, Martinez MA.** 2014. Strong epistatic interactions within a single  
512 protein. *Molecular biology and evolution* **31**:1546-1553.
- 513 40. **Shafer RW, Schapiro JM.** 2008. HIV-1 drug resistance mutations: an updated  
514 framework for the second decade of HAART. *AIDS reviews* **10**:67-84.
- 515 41. **Flynn WF, Haldane A, Torbett BE, Levy RM.** 2017. Inference of Epistatic  
516 Effects Leading to Entrenchment and Drug Resistance in HIV-1 Protease.  
517 *Molecular biology and evolution* **34**:1291-1306.
- 518 42. **Cambrey G, Mazel D.** 2008. Synonymous genes explore different evolutionary  
519 landscapes. *PLoS Genet* **4**:e1000256.
- 520 43. **Maschera B, Furfine E, Blair ED.** 1995. Analysis of resistance to human  
521 immunodeficiency virus type 1 protease inhibitors by using matched bacterial  
522 expression and proviral infection vectors. *Journal of virology* **69**:5431-5436.
- 523 44. **Parera M, Clotet B, Martinez MA.** 2004. Genetic screen for monitoring severe  
524 acute respiratory syndrome coronavirus 3C-like protease. *Journal of virology*  
525 **78**:14057-14061.
- 526 45. **Pauwels R, Balzarini J, Baba M, Snoeck R, Schols D, Herdewijn P,**  
527 **Desmyter J, De Clercq E.** 1988. Rapid and automated tetrazolium-based  
528 colorimetric assay for the detection of anti-HIV compounds. *Journal of*  
529 *virological methods* **20**:309-321.

- 530 46. **Betancor G, Alvarez M, Marcelli B, Andres C, Martinez MA, Menendez-**  
531 **Arias L.** 2015. Effects of HIV-1 reverse transcriptase connection subdomain  
532 mutations on polypurine tract removal and initiation of (+)-strand DNA  
533 synthesis. *Nucleic acids research* **43**:2259-2270.
- 534 47. **Capel E, Martrus G, Parera M, Clotet B, Martinez MA.** 2012. Evolution of  
535 the human immunodeficiency virus type 1 protease: effects on viral replication  
536 capacity and protease robustness. *J Gen Virol* **93**:2625-2634.
- 537 48. **Fernandez G, Clotet B, Martinez MA.** 2007. Fitness landscape of human  
538 immunodeficiency virus type 1 protease quasispecies. *Journal of virology*  
539 **81**:2485-2496.
- 540 49. **Magoc T, Salzberg SL.** 2011. FLASH: fast length adjustment of short reads to  
541 improve genome assemblies. *Bioinformatics* **27**:2957-2963.
- 542 50. **Gregori J, Esteban JI, Cubero M, Garcia-Cehic D, Perales C, Casillas R,**  
543 **Alvarez-Tejado M, Rodriguez-Frias F, Guardia J, Domingo E, Quer J.**  
544 2013. Ultra-deep pyrosequencing (UDPS) data treatment to study amplicon  
545 HCV minor variants. *PloS one* **8**:e83361.
- 546 51. **Paradis E, Claude J, Strimmer K.** 2004. APE: Analyses of Phylogenetics and  
547 Evolution in R language. *Bioinformatics* **20**:289-290.
- 548 52. **Charif D, Thioulouse J, Lobry JR, Perriere G.** 2005. Online synonymous  
549 codon usage analyses with the ade4 and seqinR packages. *Bioinformatics*  
550 **21**:545-547.
- 551 53. **Tamura K, Stecher G, Peterson D, Filipski A, Kumar S.** 2013. MEGA6:  
552 Molecular Evolutionary Genetics Analysis version 6.0. *Molecular biology and*  
553 *evolution* **30**:2725-2729.

554 54. **Wolinsky SM, Kunstman KJ, Safrit JT, Koup RA, Neumann AU, Korber**

555 **BT.** 1996. Response: HIV-1 Evolution and Disease Progression. *Science*

556 **274:**1010-1011.

557



558 **Figure legends**

559 **FIG 1** HIV-1 protease nucleotide sequences of the wild-type (WT) virus that  
560 corresponds to the HIV-1 HXB2 strain (<http://www.hiv.lanl.gov>), and of the synthetic  
561 MAX variant that was generated by PCR combining three overlapping synthetic DNA  
562 oligonucleotides as previously described (10). No substitution was introduced in the  
563 first 40 protease amino-terminal nucleotides that overlap with the carboxy-terminal of  
564 the gag p6 reading frame.

565

566 **FIG 2** Replication kinetic assay of wild-type HIV-1 (WT<sub>p1</sub>) and the recoded MAX  
567 protease variant (MAX<sub>p1</sub>) in MT-4 cells. HIV-1 antigen p24 concentrations in culture  
568 supernatants were measured on days 0-4 in the absence of drug or days 0-6 in the  
569 presence of drug. For each virus, the slope of the plot provides an estimate of the viral  
570 replication capacity. Bars show the slope of the p24 antigen production from each virus  
571 after infection of MT-4 cells. Comparison between WT<sub>p1</sub> (HXB2) and the mutant  
572 MAX recoded viruses are shown, as well as between the corresponding WT and MAX  
573 virus variants (i.e., S37P, G48L, Q58E, I84V and I89L). The significance of the  
574 difference between slopes was calculated using an unpaired t-test with Welch's  
575 correction in GraphPrism v. 7 software. **(A)** Kinetic assays performed in the absence of  
576 drug. All slopes values were statistically tested against the WT value. Only WTG48L  
577 and MAXG48L displayed a lower replication capacity than the WT. **(B)** Kinetic assays  
578 performed in the presence of 20nM atazanavir (ATV). All slopes values were  
579 statistically tested against the WT value. WTG48L, MAXG48L and WTQ58E displayed  
580 a higher replication capacity than the WT in the presence of ATV. Values represent the  
581 mean  $\pm$  standard deviation (SD) from at least three independent experiments.

582

583 **FIG 3** Maximum likelihood phylogram of wild-type (WT) and MAX unique HIV-1  
584 protease amino acid variants selected after 32 passages in MT-4 cells and in the  
585 presence of **(A)** atazanavir (ATV) or **(B)** darunavir (DRV). Phylogenetic reconstruction  
586 was generated using a Jones-Taylor Thornton (JTT) model as implemented in the  
587 MEGA6 software package. Both phylogenetic trees showed that the WT and MAX  
588 viruses, which shared an identical starting amino acid sequence, followed different  
589 evolutionary trajectories. Blue and red labels correspond to WT and MAX variants,  
590 respectively. Green labels represent the starting HXB2 protease amino acid sequence.  
591  
592

593 **TABLE 1** Susceptibility of HIV-1 carrying WT or MAX proteases to atazanavir (ATV)  
594 or darunavir (DRV)

| Protease | IC <sub>50</sub> (nM)      |                |
|----------|----------------------------|----------------|
|          | ATV                        | DRV            |
| WTp1     | 3.1 ± 1.2 (1) <sup>1</sup> | 0.9 ± 0.3 (1)  |
| WTp32    | 14.6 ± 5.3 (5)             | 5.7 ± 1.0 (6)  |
| MAXp1    | 1.6 ± 0.1 (1)              | 0.9 ± 0.2 (1)  |
| MAXp32   | 21.2 ± 9.0 (13)            | 9.3 ± 1.9 (10) |

595 <sup>1</sup>Fold change.

596 **TABLE 2** Substitutions associated with protease inhibitor resistance detected after MT-  
 597 4 cell passages in the presence of atazanavir (ATV), darunavir (DRV), or no drug (ND)

| ATV               | Experiment 1     |       | Experiment 2 |       | DRV  | Experiment 1 |       | Experiment 2 |       | ND   | Experiment 1 |       |
|-------------------|------------------|-------|--------------|-------|------|--------------|-------|--------------|-------|------|--------------|-------|
|                   | WTp1             | MAXp1 | WTp1         | MAXp1 |      | WTp1         | MAXp1 | WTp1         | MAXp1 |      | WTp1         | MAXp1 |
| L10F <sup>1</sup> | 1.0 <sup>2</sup> | 28.0  | 0            | 0     | L10F | 0            | 19.2  | 0            | 0     | D30N | 1.4          | 2.3   |
| G16E              | 1.7              | 0     | 1.8          | 0     | G16E | 16.5         | 0     | 55.5         | 0     | S37P | 0            | 11.7  |
| L23I              | 0.8              | 0     | 0            | 0     | E21K | 0            | 1.4   | 0            | 0     | P39Q | 2.1          | 0     |
| V32A              | 76.3             | 0     | 53.3         | 59.9  | A28S | 46.1         | 45.4  | 6.6          | 0     | P39T | 0.8          | 0     |
| V32I              | 10.1             | 24.0  | 2.9          | 23.8  | L33F | 0            | 94.2  | 0            | 89.2  | R41K | 0.8          | 0     |
| V32T              | 0.65             | 0     | 0            | 0     | P39Q | 0.6          | 0     | 0.6          | 0     | K43R | 0            | 0.5   |
| L33F              | 0                | 0.8   | 0            | 0     | K45I | 0            | 0     | 0            | 9.8   | Q58K | 0            | 1.1   |
| P39Q              | 0.9              | 0     | 0.9          | 0     | M46I | 6.0          | 3.9   | 94.0         | 14.6  | I72T | 1.8          | 0     |
| K45I              | 0                | 10.2  | 6.0          | 0     | I50L | 49.7         | 52.3  | 39.1         | 100   | V82I | 1.3          | 0     |
| K45R              | 0                | 0.8   | 0            | 0     | Q58K | 0            | 0     | 0            | 1.2   |      |              |       |
| M46I              | 12.1             | 0     | 1.1          | 10.4  | H69Y | 0            | 0.6   | 0            | 0     |      |              |       |
| G48L              | 0                | 0     | 0            | 22.4  | A71V | 0            | 25.2  | 0            | 0     |      |              |       |
| I50L              | 0                | 28.6  | 27.3         | 0     | V82I | 85.2         | 0.6   | 34.8         | 19.7  |      |              |       |
| Q58E              | 0                | 20.2  | 0            | 0     | I84V | 3.4          | 0     | 0            | 0     |      |              |       |
| Q58K              | 0                | 0     | 0            | 0.8   |      |              |       |              |       |      |              |       |
| A71V              | 88.2             | 23.2  | 62.8         | 71.1  |      |              |       |              |       |      |              |       |
| V77I              | 0                | 0     | 11.4         | 0     |      |              |       |              |       |      |              |       |
| V82I              | 0                | 0     | 9.8          | 0     |      |              |       |              |       |      |              |       |
| V82D              | 0                | 0     | 0            | 1.2   |      |              |       |              |       |      |              |       |
| I84V              | 0                | 43.0  | 0            | 0     |      |              |       |              |       |      |              |       |
| N88S              | 14.0             | 28.2  | 19.7         | 3.4   |      |              |       |              |       |      |              |       |
| I89L              | 0                | 0     | 0            | 59.4  |      |              |       |              |       |      |              |       |
| T91S              | 0                | 3.6   | 0            | 0     |      |              |       |              |       |      |              |       |

598 <sup>1</sup>HIV-1 protease amino acid position.

599 <sup>2</sup>Percentage of the corresponding substitution.

600

601 **TABLE 3** Susceptibility of HIV-1 carrying WT or MAX protease variants to atazanavir  
602 (ATV).

| Protease | ATV IC <sub>50</sub> (nM)  |
|----------|----------------------------|
| WT       | 1.8 ± 1.2 (1) <sup>1</sup> |
| MAX      | 1.6 ± 0.4 (0.9)            |
| WTS37P   | 2.2 ± 1.0 (1.2)            |
| MAXS37P  | 2.2 ± 1.4 (1.2)            |
| WTG48L   | 14.4 ± 0.5 (8.1)           |
| MAXG48L  | 14.4 ± 1.4 (8.1)           |
| WTQ58E   | 4.6 ± 2.5 (2.6)            |
| MAXQ58E  | 5.6 ± 3.8 (3.2)            |
| WTI84V   | 1.3 ± 0.9 (0.7)            |
| MAXI84V  | 1.5 ± 0.8 (0.8)            |
| WTL89I   | 1.5 ± 0.5 (0.8)            |
| MAXL89I  | 2.1 ± 0.6 (1.2)            |

603 <sup>1</sup>Fold change.

604

605 **TABLE 4** Summary of population metrics

| Protease   | Bases<br>sequenced | Mutations<br>detected (%) | Sequence<br>diversity<br>(p-distance) | Synonymous<br>diversity<br>(p-distance) | Nonsynonymous<br>diversity<br>(p-distance) | $S_n^1$ |
|------------|--------------------|---------------------------|---------------------------------------|-----------------------------------------|--------------------------------------------|---------|
| WTp1       | $8.8 \times 10^6$  | 2691 (0.03)               | $0.00047 \pm$<br>0.00000              | 0                                       | $0.00062 \pm$<br>0.00001                   | 0.04    |
| MAXp1      | $8.5 \times 10^6$  | 4257 (0.05)               | $0.00085 \pm$<br>0.00004              | 0                                       | $0.00113 \pm$<br>0.00006                   | 0.05    |
| WTp32      | $7.2 \times 10^6$  | 2465 (0.03)               | $0.00057 \pm$<br>0.00001              | $0.00053 \pm$<br>0.00002                | $0.00061 \pm$<br>0.00001                   | 0.05    |
| MAXp32     | $5.2 \times 10^6$  | 2924 (0.06)               | $0.00095 \pm$<br>0.00001              | $0.000310 \pm$<br>0.00002               | $0.00117 \pm$<br>0.00001                   | 0.06    |
| WTp32 ATV  | $1.9 \times 10^7$  | 71206 (0.37)              | $0.00517 \pm$<br>0.00004              | $0.00016 \pm$<br>0.00001                | $0.0067 \pm$<br>0.00003                    | 0.2     |
| MAXp32 ATV | $2.5 \times 10^7$  | 180514 (0.73)             | $0.00946 \pm$<br>0.00005              | $0.000356 \pm$<br>0.00001               | $0.01252 \pm$<br>0.00005                   | 0.27    |
| WTp32 DRV  | $4.1 \times 10^7$  | 148066 (0.36)             | $0.00482 \pm$<br>0.00003              | $0.00016 \pm$<br>0.00001                | $0.00624 \pm$<br>0.00003                   | 0.16    |
| MAXp32 DRV | $1.9 \times 10^7$  | 95202 (0.73)              | $0.00490 \pm$<br>0.00004              | $0.00026 \pm$<br>0.00001                | $0.00756 \pm$<br>0.00004                   | 0.17    |

606 <sup>1</sup>Shannon's entropy.

607

608

609

\*          20          \*          40          \*  
WTp1 : CCTCAGATCACTCTTTGGCAACGACCCCTCGTCACAATAAAGATAGGGGG : 50  
MAXp1 : .....T.. : 50

                  60          \*          80          \*          100  
WTp1 : GCAACTAAAGGAAGCTCTATTAGATACAGGAGCAGATGATACAGTATTAG : 100  
MAXp1 : T.....A.....T.....T..T.... : 100

                  \*          120          \*          140          \*  
WTp1 : AAGAAATGAGTTTGGCCAGGAAGATGGAAACCAAAAATGATAGGGGGAATT : 150  
MAXp1 : .....TCGC....G..CC.C....G.....C... : 150

                  160          \*          180          \*          200  
WTp1 : GGAGGTTTTATCAAAGTAAGACAGTATGATCAGATACTCATAGAAATCTG : 200  
MAXp1 : .....A.....A.....A.....A...T.A.....A.. : 200

                  \*          220          \*          240          \*  
WTp1 : TGGACATAAAGCTATAGGTACAGTATTAGTAGGACCTACACCTGTCAACA : 250  
MAXp1 : .....A.....T.....C..G..G..... : 250

                  260          \*          280          \*  
WTp1 : TAATTGGAAGAAATCTGTTGACTCAGATTGGTTGCACTTTAAATTTT : 297  
MAXp1 : .C..A.....T.A..A..A..A..A..T..... : 297

A

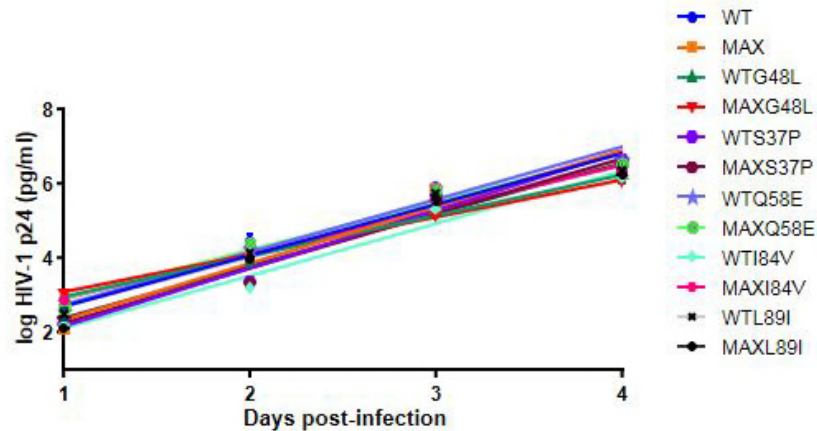

NO DRUG

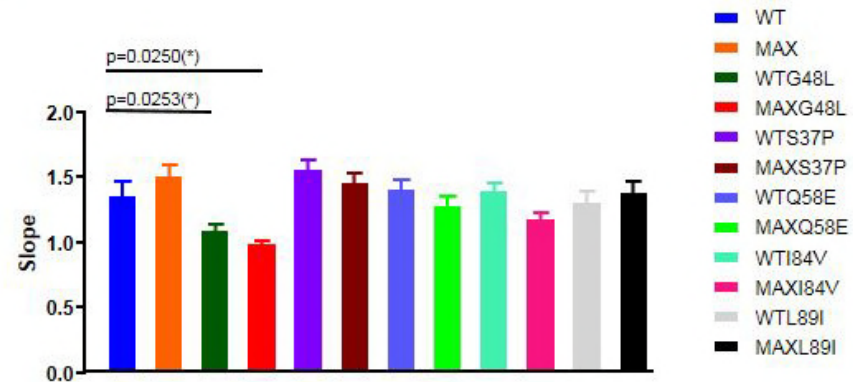

B

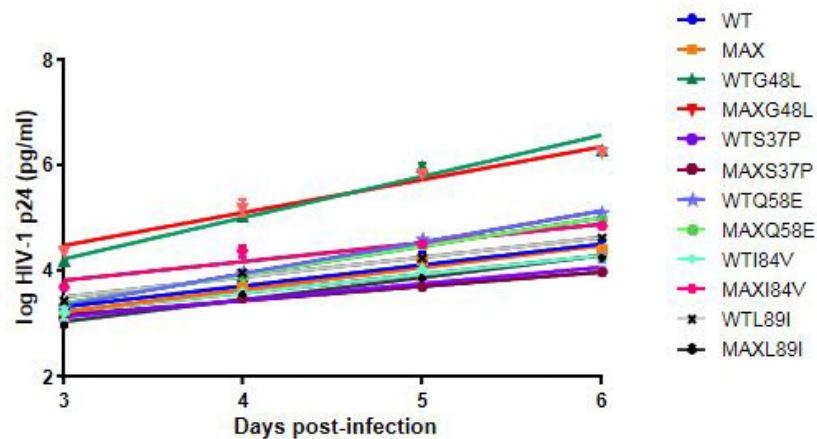

ATV

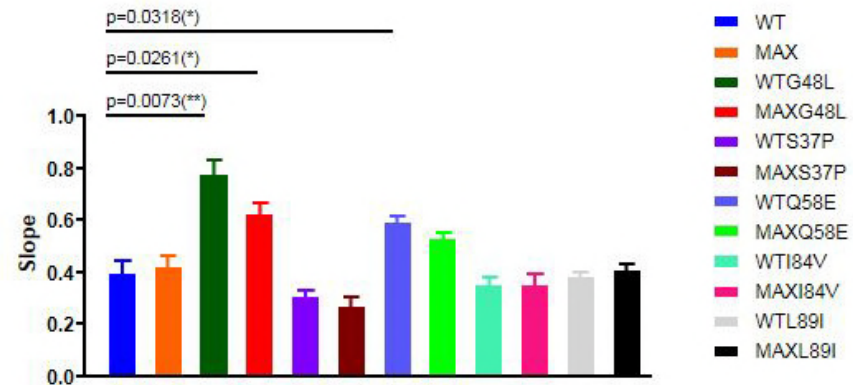



**A**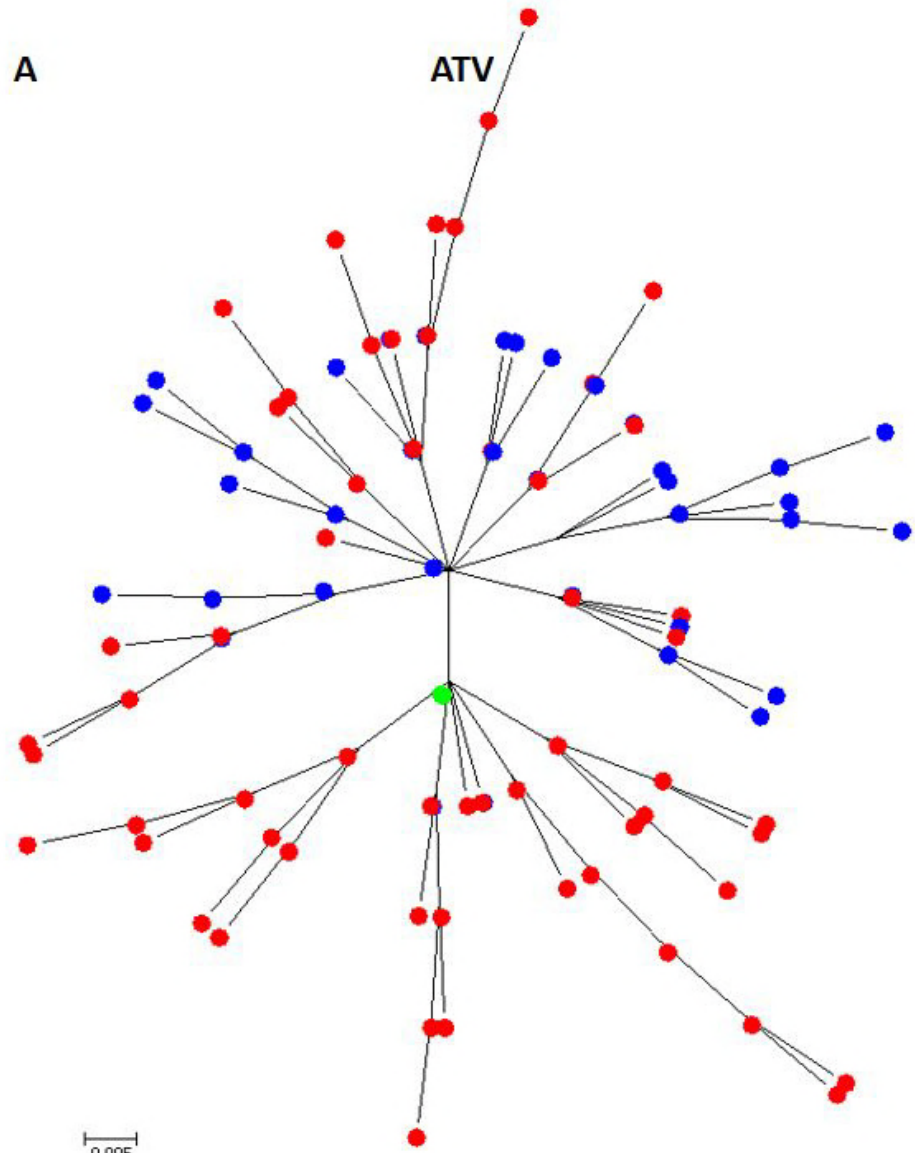**B**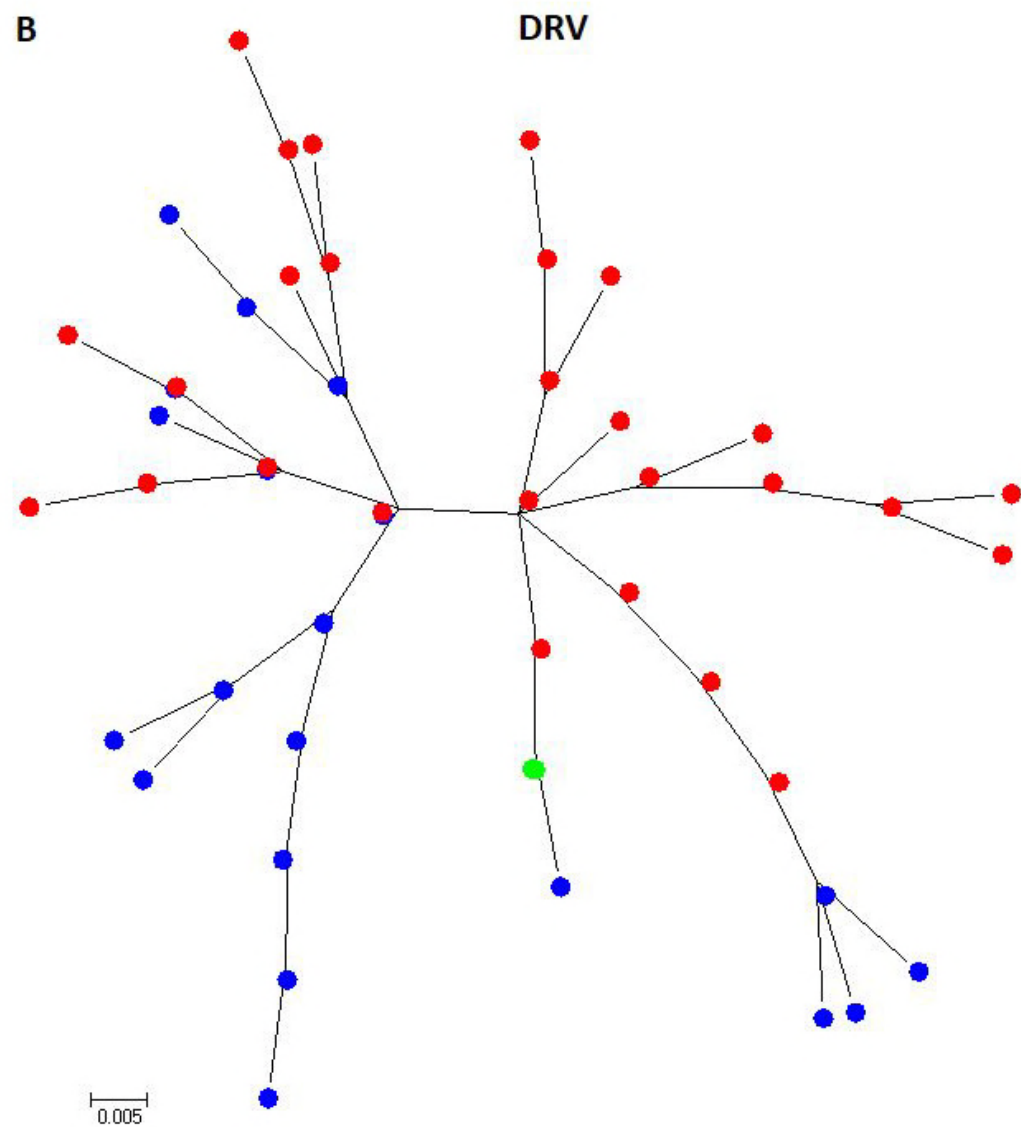

Source: https://www.biorxiv.org/content/10.1101/315366v1.full.pdf
